# Supplementary material for: The molecular and electronic structure of an unusual cobalt NNO pincer ligand complex
Source: Royal Society of Chemistry journal article supplement (doi:10.1039/c9dt00056a), 2019-01-01
Supplement: c9dt00056a1.pdf [file c9dt00056a1.pdf]

## **Molecular and Electronic Structure of an Unusual Cobalt NNO pincer ligand complex**

Jitendrasingh Rajpurohit, and Maheswaran Shanmugam\*

1. Table for CShm calculation.
2. Selected bond length and bond angle table
3. Magnetic measurement for complex **2**.

**Table S1.** Table for CShm calculation.

|                                       |                 |                   |                    |                          |                            |
|---------------------------------------|-----------------|-------------------|--------------------|--------------------------|----------------------------|
| Geometry                              | Pentagon        | Vacant octahedron | Trigonal bipyramid | Spherical square pyramid | Johnson trigonal bipyramid |
| Point group                           | D <sub>5h</sub> | C <sub>4v</sub>   | D <sub>3h</sub>    | C <sub>4v</sub>          | D <sub>3h</sub>            |
| Deviation from the indicated geometry | 32.209          | 3.242             | 5.173              | <b>1.714</b>             | 7.805                      |

**Table S2-S3.** Table for the selected bond length and bond angle for complex **2**.

| Atom   | Atom    | Length/ Å  |
|--------|---------|------------|
| Co(11) | -N(112) | 1.8364(11) |
| Co(11) | -O(111) | 1.9411(10) |
| Co(11) | -N(111) | 1.9486(12) |
| Co(11) | -P(161) | 2.1993(4)  |
| Co(11) | -P(151) | 2.2338(4)  |
| Co(2)  | -C(14)  | 1.9380(14) |
| Co(2)  | -C(13)  | 2.1159(14) |
| Co(2)  | -C(15)  | 2.1357(14) |
| Co(2)  | -P(71)  | 2.1654(4)  |
| Co(2)  | -P(81)  | 2.1676(4)  |
| Co(2)  | -P(91)  | 2.1847(4)  |
| Co(1)  | -N(12)  | 1.8397(11) |
| Co(1)  | -N(11)  | 1.9469(12) |
| Co(1)  | -O(11)  | 1.9501(10) |
| Co(1)  | -P(61)  | 2.2079(4)  |
| Co(1)  | -P(51)  | 2.2387(4)  |
| Co(12) | -C(114) | 1.9366(14) |
| Co(12) | -C(113) | 2.1087(14) |
| Co(12) | -C(115) | 2.1367(14) |
| Co(12) | -P(171) | 2.1642(4)  |
| Co(12) | -P(181) | 2.1672(4)  |
| Co(12) | -P(191) | 2.1839(4)  |

| <b>Atom</b> | <b>Atom</b> | <b>Atom</b> | <b>Angle/°</b> |
|-------------|-------------|-------------|----------------|
| N(112)      | -Co(11)     | -O(111)     | 80.64(5)       |
| N(112)      | -Co(11)     | -N(111)     | 81.34(5)       |
| O(111)      | -Co(11)     | -N(111)     | 149.73(5)      |
| N(112)      | -Co(11)     | -P(161)     | 160.33(4)      |
| O(111)      | -Co(11)     | -P(161)     | 85.55(3)       |
| N(111)      | -Co(11)     | -P(161)     | 104.67(3)      |
| N(112)      | -Co(11)     | -P(151)     | 92.29(4)       |
| O(111)      | -Co(11)     | -P(151)     | 95.40(3)       |
| N(111)      | -Co(11)     | -P(151)     | 109.45(4)      |
| P(161)      | -Co(11)     | -P(151)     | 102.946(16)    |
| C(14)       | -Co(2)      | -C(13)      | 41.46(6)       |
| C(14)       | -Co(2)      | -C(15)      | 40.98(5)       |
| C(13)       | -Co(2)      | -C(15)      | 68.34(5)       |
| C(14)       | -Co(2)      | -P(71)      | 111.80(4)      |
| C(13)       | -Co(2)      | -P(71)      | 151.81(4)      |
| C(15)       | -Co(2)      | -P(71)      | 84.52(4)       |
| C(14)       | -Co(2)      | -P(81)      | 101.04(4)      |
| C(13)       | -Co(2)      | -P(81)      | 96.71(4)       |
| C(15)       | -Co(2)      | -P(81)      | 136.88(4)      |
| P(71)       | -Co(2)      | -P(81)      | 98.187(16)     |
| C(14)       | -Co(2)      | -P(91)      | 134.87(4)      |
| C(13)       | -Co(2)      | -P(91)      | 98.65(4)       |
| C(15)       | -Co(2)      | -P(91)      | 117.20(4)      |
| P(71)       | -Co(2)      | -P(91)      | 100.531(17)    |
| P(81)       | -Co(2)      | -P(91)      | 104.660(17)    |
| N(12)       | -Co(1)      | -N(11)      | 81.02(5)       |
| N(12)       | -Co(1)      | -O(11)      | 80.61(5)       |
| N(11)       | -Co(1)      | -O(11)      | 150.28(5)      |

|                      |             |
|----------------------|-------------|
| N(12)-Co(1)-P(61)    | 160.91(4)   |
| N(11)-Co(1)-P(61)    | 104.74(4)   |
| O(11)-Co(1)-P(61)    | 86.27(3)    |
| N(12)-Co(1)-P(51)    | 92.44(4)    |
| N(11)-Co(1)-P(51)    | 108.65(4)   |
| O(11)-Co(1)-P(51)    | 95.29(3)    |
| P(61)-Co(1)-P(51)    | 102.586(16) |
| C(114)-Co(12)-C(113) | 41.48(6)    |
| C(114)-Co(12)-C(115) | 40.93(5)    |
| C(113)-Co(12)-C(115) | 68.42(5)    |
| C(114)-Co(12)-P(171) | 112.37(4)   |
| C(113)-Co(12)-P(171) | 152.34(4)   |
| C(115)-Co(12)-P(171) | 84.87(4)    |
| C(114)-Co(12)-P(181) | 100.81(4)   |
| C(113)-Co(12)-P(181) | 96.90(4)    |
| C(115)-Co(12)-P(181) | 136.31(4)   |
| P(171)-Co(12)-P(181) | 97.722(16)  |
| C(114)-Co(12)-P(191) | 134.04(4)   |
| C(113)-Co(12)-P(191) | 97.45(4)    |
| C(115)-Co(12)-P(191) | 117.58(4)   |
| P(171)-Co(12)-P(191) | 101.348(16) |
| P(181)-Co(12)-P(191) | 104.712(16) |

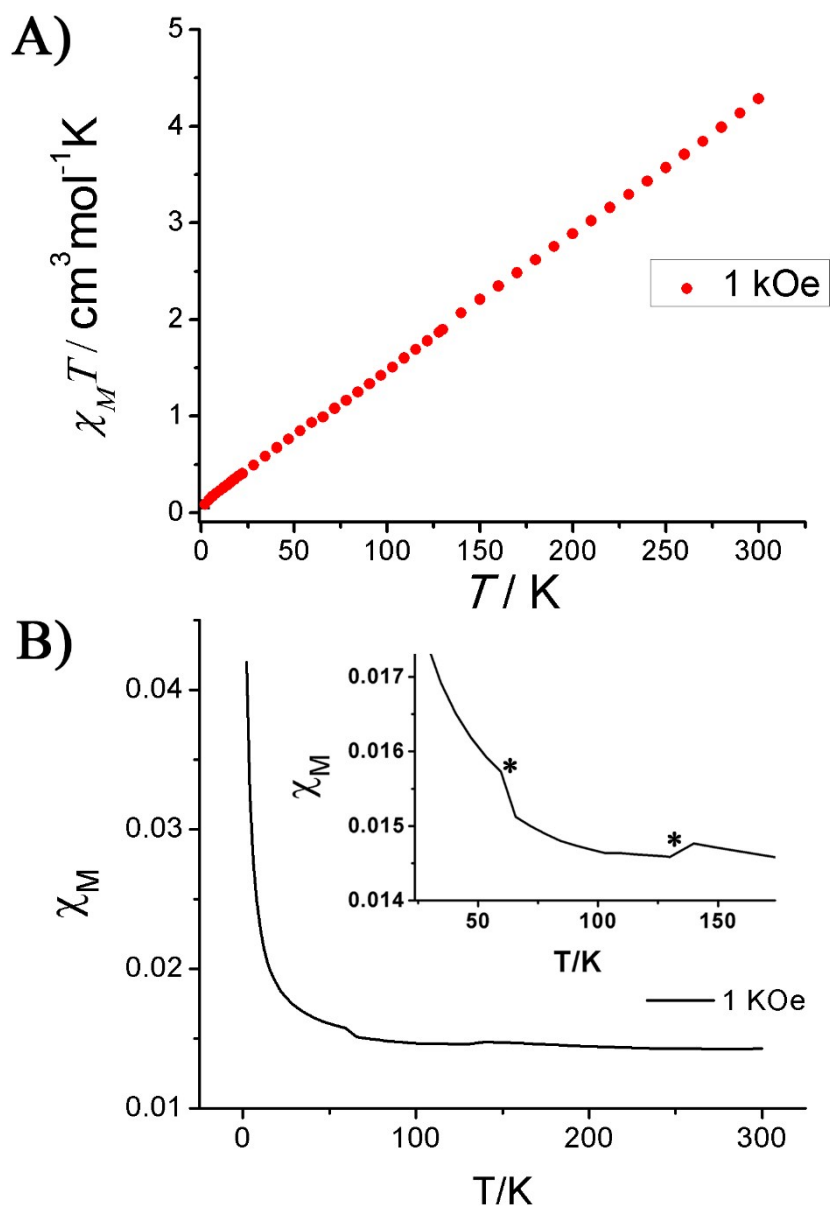

**Figure S1.** Temperature dependent magnetic susceptibility performed on polycrystalline sample of 2 in the presence of an external magnetic field of 1 kOe A) molar magnetic susceptibility temperature product as a function of temperature B) molar magnetic susceptibility as a function of temperature. Inset: Zoomed in region of  $\chi_M = f(T)$  plot where the maxima appears at two different temperature (\*) are indicated.
